# Supplementary material for: Effects of a small molecule R-spondin-1 substitute RS-246204 on a mouse intestinal organoid culture
Source: PubMed Central journal article supplement (PMC5814218; doi:10.18632/oncotarget.23721), 2017-12-26
Supplement: oncotarget-09-6356-s001.pdf [file oncotarget-09-6356-s001.pdf]

# Effects of a small molecule R-spondin-1 substitute RS-246204 on a mouse intestinal organoid culture

## SUPPLEMENTARY MATERIALS

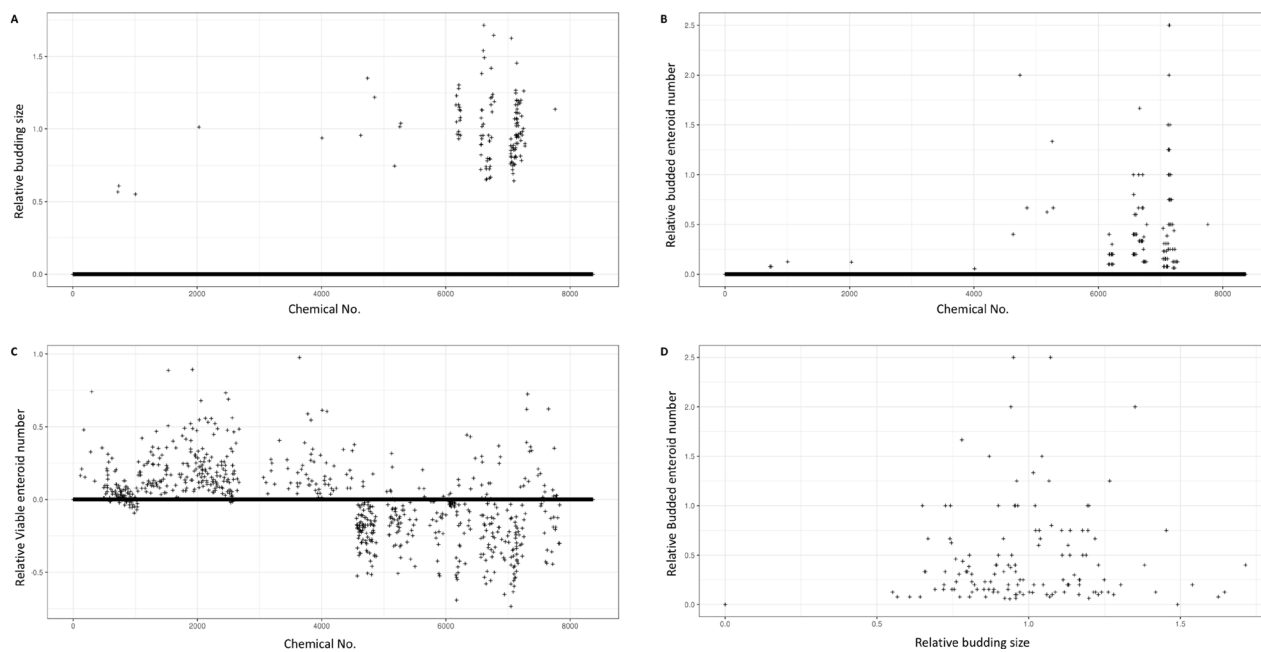

**Supplementary Figure 1: Primary screening results to find a small molecule R-spondin-1 substitute.** (A) Screening results based on relative budding size, (B) Screening results based on relative budded enteroid number, (C) Screening results based on relative viable enteroid number, (D) Plot for relative budding size and budded enteroid number.

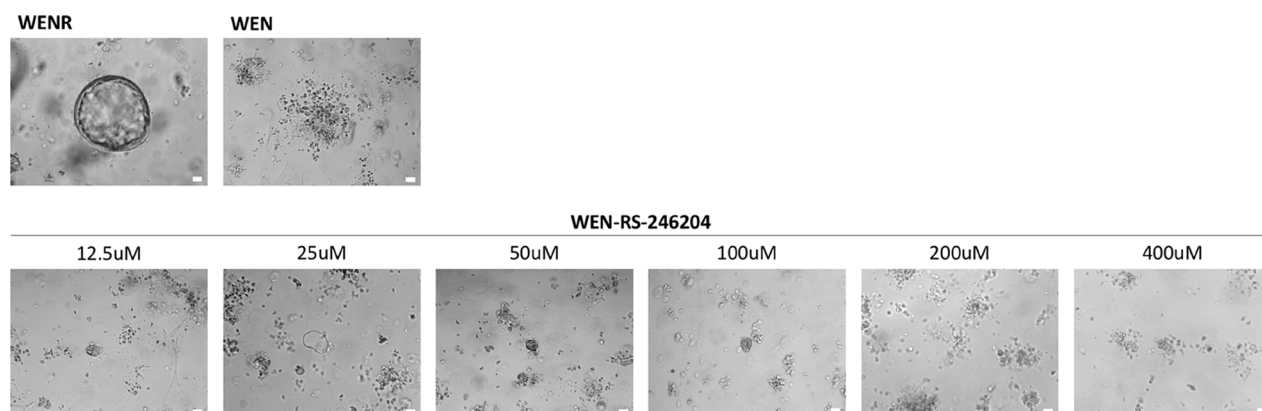

**Supplementary Figure 2: Effects of RS-246204 on colonoid formation and growth.** Bright-field images of colonoids treated with various concentrations of RS-246204. Bars, 100  $\mu\text{m}$ .

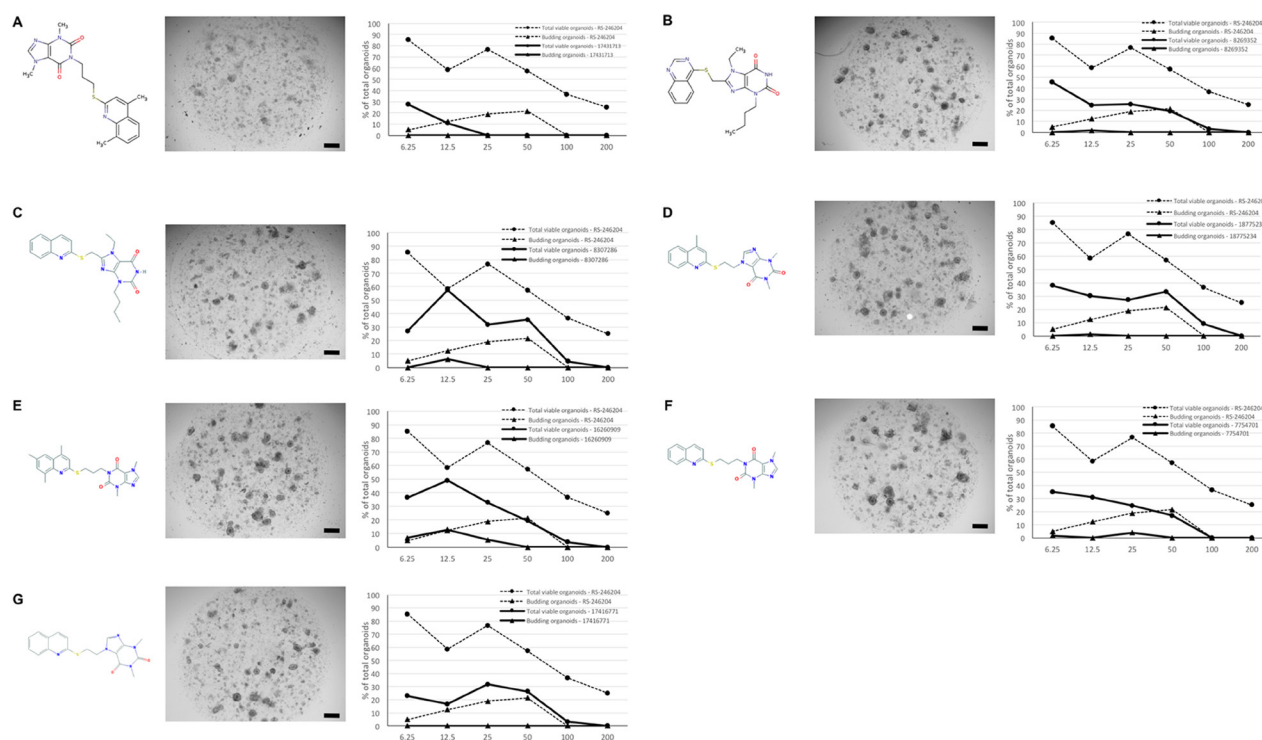

**Supplementary Figure 3: Efficacy analysis for seven compounds with tanimoto coefficient of 0.9 or higher for RS-246204.** For each compound panel, the chemical structure on the left, the representative photograph on the middle, and the test result on the right. (A) PubChem CID: 17431713, (B) PubChem CID: 826952, (C) PubChem CID: 8307286, (D) PubChem CID: 18775234, (E) PubChem CID: 16260909, (F) PubChem CID: 7754701, (G) PubChem CID: 171671.

### Experimental groups; Grown in EN + Compound medium

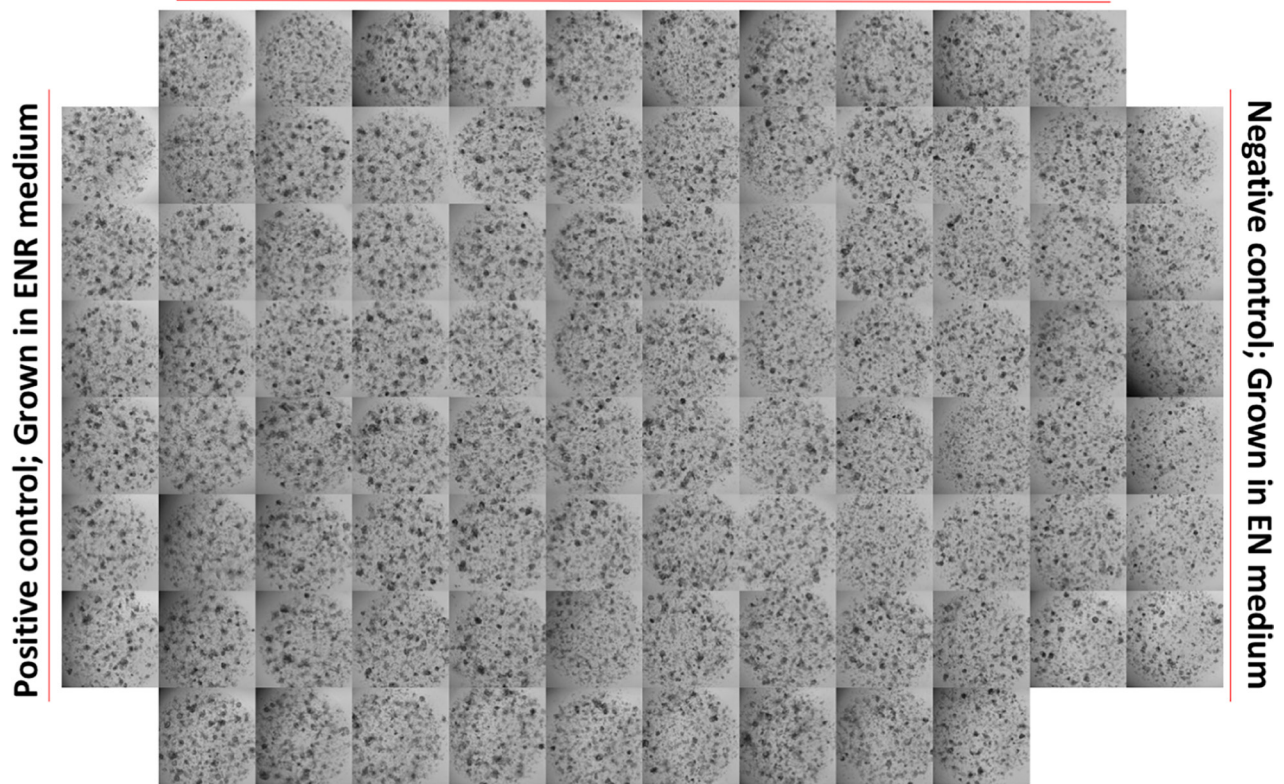

**Supplementary Figure 4: Efficacy test for RS-246204-like compounds based on the chemical library of the Korean Chemical Bank.** In order to confirm the effect of replacing 79 similar compounds with R-spondin, it was confirmed whether the compound could generate enteroids in the crypts.

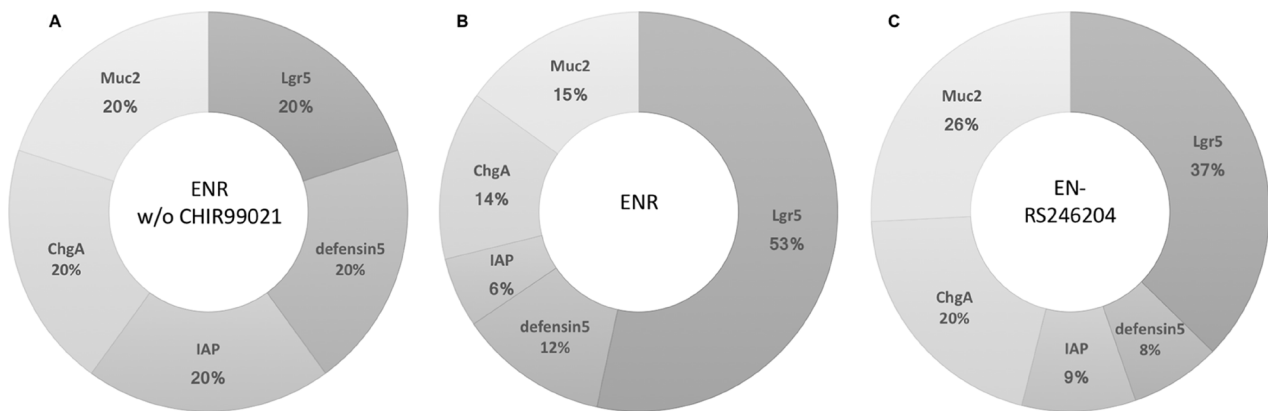

**Supplementary Figure 5: Analysis of cellular composition by components of enteroid growth media.** In order to investigate how the cellular composition of enteroid differs according to the media components, the proportion of each cell marker in the total is determined based on the amount of relative mRNA. Results from enteroids grown with ENR without CHIR99041 (A), ENR (B) and EN-RS246204 (C)

**Supplementary Table 1: Detailed results for the efficacy of 11 compounds selected as primary hits**

| Chemical No. | Plate No. | Chemical ID | Chemical Position | Budding no | Budding size | Budding No. ratio | Budding size ratio | Budding No. ratio x Budding size ratio | Viable No | Viable No - Negative No | Viable No. ratio |
|--------------|-----------|-------------|-------------------|------------|--------------|-------------------|--------------------|----------------------------------------|-----------|-------------------------|------------------|
| 2030         | 026       | 246204      | U-001026-F06      | 4          | 516.8        | 0.12              | 1.01               | 0.123                                  | 46        | 45.83                   | 0.548            |
| 4009         | 051       | 229510      | U-001051-A04      | 2          | 441.7        | 0.056             | 0.94               | 0.052                                  | 46        | 45.83                   | 0.614            |
| 6209         | 078       | 228585      | U-001078-A09      | 1          | 384.8        | 0.1               | 0.96               | 0.096                                  | 128       | 12.33                   | 0.097            |
| 6576         | 083       | 9855        | U-001083-H04      | 1          | 508.4        | 0.2               | 1.13               | 0.226                                  | 86        | 10                      | 0.099            |
| 6577         | 083       | 17349       | U-001083-A05      | 2          | 621.3        | 0.4               | 1.38               | 0.553                                  | 106       | 30                      | 0.297            |
| 6579         | 083       | 10094       | U-001083-C05      | 2          | 419.3        | 0.4               | 0.93               | 0.373                                  | 77        | 1                       | 0.010            |
| 6585         | 083       | 22518       | U-001083-A06      | 3          | 508.0        | 0.6               | 1.13               | 0.678                                  | 102       | 26                      | 0.257            |
| 6656         | 084       | 22723       | U-001084-H04      | 1          | 390.4        | 0.33              | 0.66               | 0.219                                  | 87        | 3.33                    | 0.036            |
| 6713         | 084       | 16781       | U-001084-A12      | 3          | 441.1        | 1                 | 0.74               | 0.742                                  | 94        | 10.33                   | 0.112            |
| 7201         | 091       | 62921       | U-001091-A03      | 2          | 365.18       | 0.12              | 0.81               | 0.102                                  | 98        | 10.33                   | 0.086            |
| 7273         | 091       | 62853       | U-001091-A12      | 2          | 403.4        | 0.12              | 0.90               | 0.112                                  | 105       | 17.33                   | 0.144            |
